# Supplementary material
Source: HighWire-hosted journal article supplement (https://bmjopen.bmj.com/content/8/1/e018802)
Supplement: inline-supplementary-material-2 [file inline-supplementary-material-2.pdf]

## Public Benefit and Privacy Panel for Health and Social Care

[nss.PBPP@nhs.net](mailto:nss.PBPP@nhs.net)

[www.informationgovernance.scot.nhs.uk](http://www.informationgovernance.scot.nhs.uk)

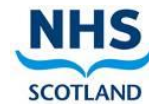

Dr Elaine Douglas  
University of Stirling  
Division of Economics  
Room 3B61  
Cottrell Building  
Stirling  
FK9 4LA

Date: 4<sup>th</sup> May 2016

Your Ref:

Our Ref: 1516-0417

Dear Dr Douglas

### **Re: Application 1516-0417/Douglas: Healthy Ageing in Scotland (HAGIS)**

Thank you for your application for consideration by the Public Benefit and Privacy Panel for Health and Social Care. Your application has undergone proportionate governance review and has been approved, subject to the following conditions:

- Please provide other routes to enable individuals to opt out of the survey including Freephone number, email and Freepost
- Please provide full details of the market research company for review by the Panel, including all security/policy documents and agreements, when appointed
- Information on other (non-consented) household members will be restricted to month and year of birth and no names or other identifiable information will be recorded/retained for the purposes of this pilot.

This approval is given to process data as specified in the approved application form, and is limited to this. Approval is valid for the period specified in your application. You are required to notify the Panel Manager of any proposed change to any aspect of your proposal, including purpose or method of processing, data or data variables being processed, study cohorts, individuals accessing and processing data, timescales, technology/infrastructure, or any other relevant change.

I would take this opportunity to remind you of the declaration you have made in your application form committing you to undertakings in respect of information governance, confidentiality and data protection. In particular you should be aware that once personal data (irrespective of de-identification or other controls applied) has been extracted from NHSS Board(s) and transferred to you, that you will then become the Data Controller as defined by the Data Protection Act (1998).

Please note that summary information about your application and its approval, including the title and nature of your proposal, will be published on the panel website ([www.informationgovernance.scot.nhs.uk](http://www.informationgovernance.scot.nhs.uk)).

I hope that your proposal progresses well,

Yours Sincerely

Ashley Gray  
Panel Manager  
NHS Scotland Public Benefit and Privacy Panel for Health and Social Care  
Email: [nss.PBPP@nhs.net](mailto:nss.PBPP@nhs.net)
