# Supplementary material
Source: HighWire-hosted journal article supplement (https://bmjopen.bmj.com/content/8/1/e018802)
Supplement: inline-supplementary-material-3 [file inline-supplementary-material-3.pdf]

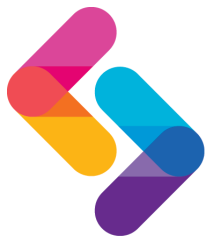

**PROJ-065 - Pilot of the Healthy Ageing In Scotland (HAGIS) study**

**Decision**

Approved

Rejected

Referred to an expert

Request for more information

**Reasons for this decision / comments of the Panel**

This project was Approved by the panel subject to Ethical Approval.

The Panel expressed the view that the documentation submitted for this project was excellent, and the submission was a good example of a pilot project.
